# Supplementary material for: ‘Drc’, a structurally novel ssDNA-binding transcription regulator of N4-related bacterial viruses
Source: PubMed Central journal article supplement — Nucleic Acids Res. 2019 Nov 14;48(1):445–59. doi: 10.1093/nar/gkz1048 (PMC7145618; doi:10.1093/nar/gkz1048), 2019-11-14
Supplement: gkz1048_supplemental_file.pdf [file gkz1048_supplemental_file.pdf]

## SUPPLEMENTARY MATERIALS

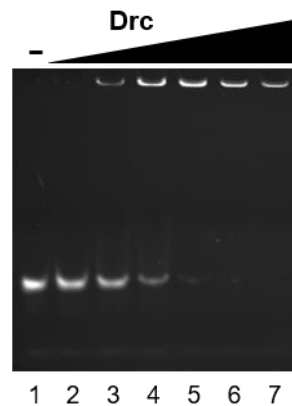

**Supplementary figure S1.** (A) Replica of EMSA on native acrylamide gel with 100 nM 5'-6-FAM-labeled ssDNA oligonucleotides combined with Drc (lane 1-7). Different concentrations of protein were used from left to right: 0, 0.5, 1, 1.5, 5, 20, 50  $\mu$ M. In this replica, the shifted DNA is visible inside the wells.

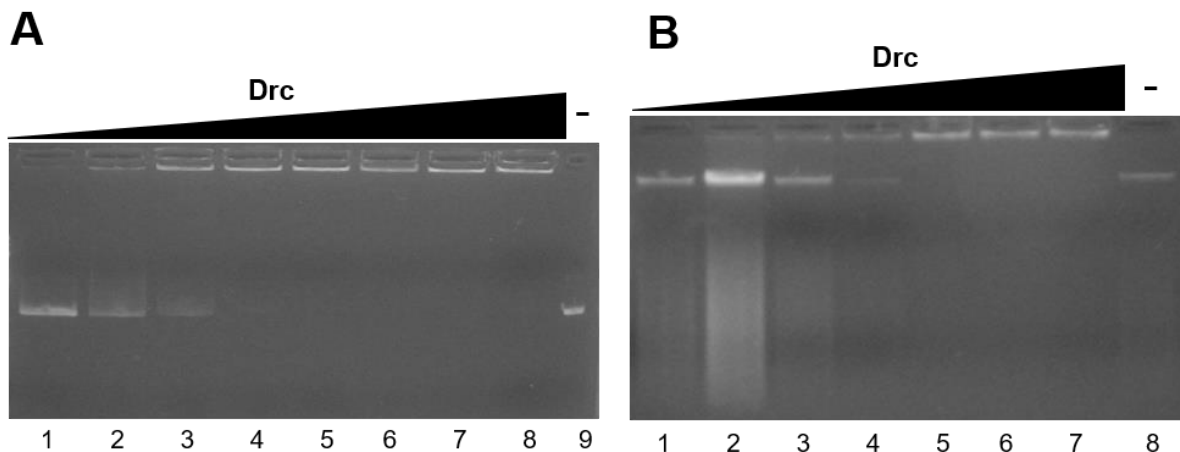

**Supplementary figure S2.** (A) EMSA on agarose gel with 100 ng pUC19 DNA and increasing concentrations of Drc (from left to right: 3, 6, 9, 12, 15, 18, 21, 22.5  $\mu$ M). Lane 9 contains a control in which Drc was replaced with protein buffer. (B) EMSA on agarose gel with 100 ng genomic LUZ7 DNA with increasing concentrations of Drc (from left to right: 1.5, 3, 6, 9, 12, 15, 18  $\mu$ M). In lane 2 double the amount was loaded to enhance visibility of smaller DNA (most likely mechanically sheared DNA due to pipetting). This sheared DNA is also shifted at higher protein concentrations, further supporting that Drc binds non-sequence specific. Lane 8 contains a control in which Drc was replaced with protein buffer.



**Supplementary table S1.** Output from the DALI protein structure comparison server. The Drc dimer was used as input in the form of a single chain and run against the full PDB database. For each chain hit, the Z-score, Root Mean Square Distance (rmsd, Å), number of structurally aligned residues (lali), number of amino acids in the hit protein (nres) and percentage of identical amino acids (%id) is given together with a description of the protein function.

| Chain  | Z-score | rmsd | lali | nres | %id | Description                                       |
|--------|---------|------|------|------|-----|---------------------------------------------------|
| 4ldb-A | 3.6     | 3.5  | 86   | 266  | 10  | Matrix protein VP40                               |
| 4cgy-A | 3.5     | 6.9  | 100  | 619  | 5   | DNA topoisomerase 3-alpha                         |
| 3f1j-A | 3.2     | 5.0  | 89   | 140  | 9   | Matrix protein                                    |
| 4rul-A | 3.1     | 7.1  | 90   | 821  | 8   | DNA topoisomerase 1                               |
| 6bk6-A | 3.0     | 3.9  | 82   | 280  | 17  | Hendra virus matrix protein                       |
| 5b0v-A | 3.0     | 4.2  | 89   | 258  | 6   | Matrix protein VP40                               |
| 3kop-F | 2.9     | 3.0  | 83   | 169  | 12  | Protein with cyclophilin-like fold                |
| 5ex1-C | 2.7     | 5.0  | 94   | 272  | 7   | Peptidyl-prolyl cis-trans isomerase cyclophilin T |
| 3x27-D | 2.7     | 3.2  | 82   | 315  | 6   | Cucumopine synthase                               |
| 2k49-A | 2.7     | 4.0  | 80   | 118  | 8   | UPF0339 protein SO_3888                           |
| 5gvc-A | 2.7     | 6.6  | 97   | 612  | 11  | DNA topoisomerase 3-beta-1                        |
| 2ykd-A | 2.6     | 3.6  | 83   | 255  | 8   | Matrix protein                                    |
| 3tcq-A | 2.6     | 3.5  | 80   | 239  | 6   | Matrix protein VP40                               |
| 4ddt-A | 2.5     | 7.4  | 83   | 1102 | 10  | Reverse gyrase                                    |
| 2ose-A | 2.3     | 4.3  | 94   | 195  | 7   | Cyclophilin                                       |
| 5uwb-A | 2.2     | 4.3  | 56   | 187  | 2   | Toluene tolerance protein                         |
| 3d9r-B | 2.2     | 8.8  | 55   | 134  | 9   | Ketosteroid isomerase-like protein                |
| 5e27-A | 2.1     | 11.5 | 51   | 226  | 0   | Resuscitation-promoting factor RPFb               |
| 4ldb-C | 2.0     | 4.6  | 81   | 237  | 7   | Matrix protein VP40                               |

**Supplementary table S2.** Output from the PDBeFOLD protein structure comparison server. The Drc dimer was used as input in the form of a single chain and run against the full PDB database at default parameters except for the similarity cut-off level, which was decreased to 60 %. For each chain hit, the Z-score, Root Mean Square Distance (rmsd, Å), number of structurally aligned residues (lali), number of amino acids in the hit protein (nres) and percentage of identical amino acids (%id) is given together with a description of the protein function.

| Chain  | Z-score | rmsd | lali | nres | %id | Description   |
|--------|---------|------|------|------|-----|---------------|
| 1oca-A | 2.7     | 3.6  | 84   | 165  | 5   | Cyclophilin A |
| 4yui-A | 2.6     | 3.8  | 84   | 163  | 6   | Cyclophilin A |
| 3yuj-A | 2.7     | 4.2  | 86   | 163  | 5   | Cyclophilin A |

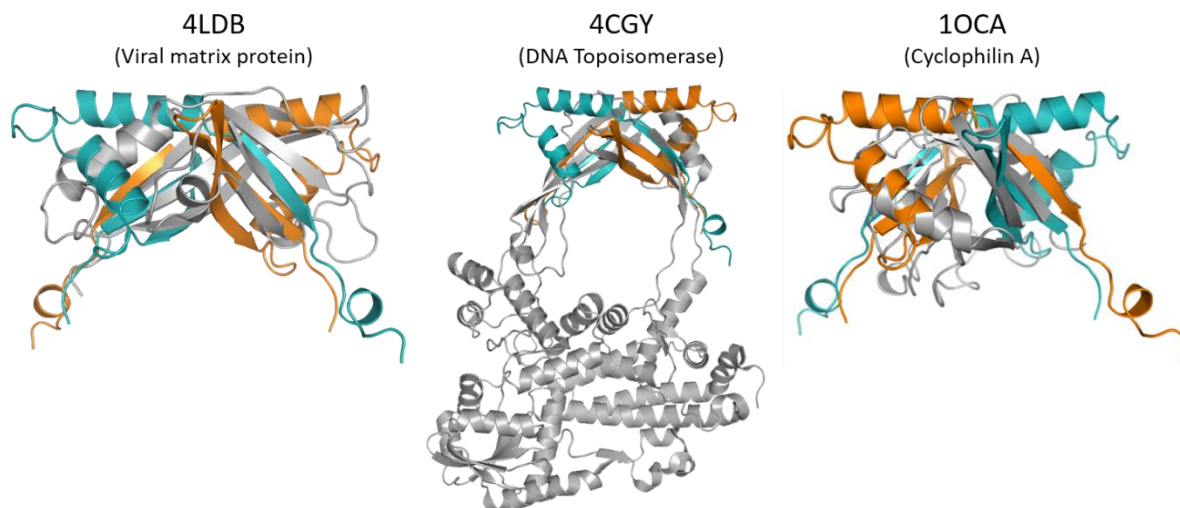

**Supplementary figure S5.** Overlay of the Drc dimer (orange, cyan) on the full A chain of three structures that are representative for the top scoring DALI and PDBeFOLD hits (grey) from table S1. Part of the 4LDB C-terminus is hidden for clarity.

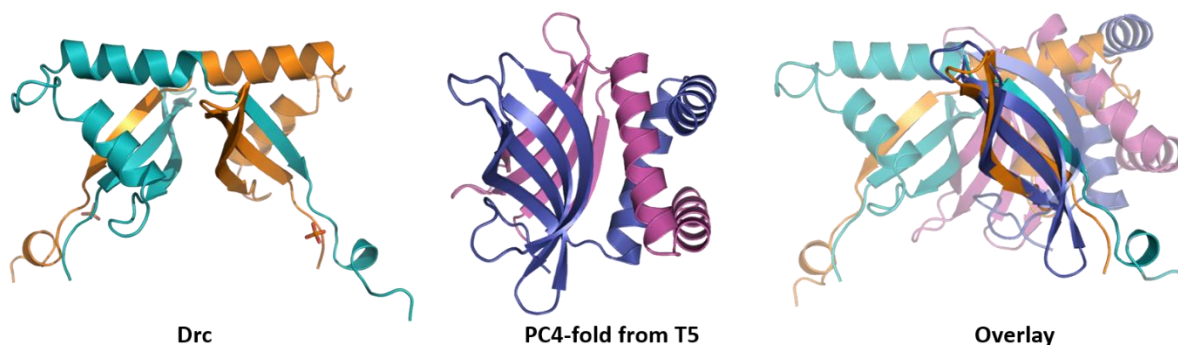

**Figure S6.** Comparison of the Drc dimer (left; colored cyan and orange) with the PC4-fold protein encoded by ORF115 of phage T5 (middle; PDB ID: 4BG7). The chains of the ORF115 dimer are colored purple and blue. Right shows the overlay of both proteins when the  $\beta$ -sheets are aligned. A single sheet can be overlaid well, while the other parts of both proteins (transparent) do not overlap.

**A**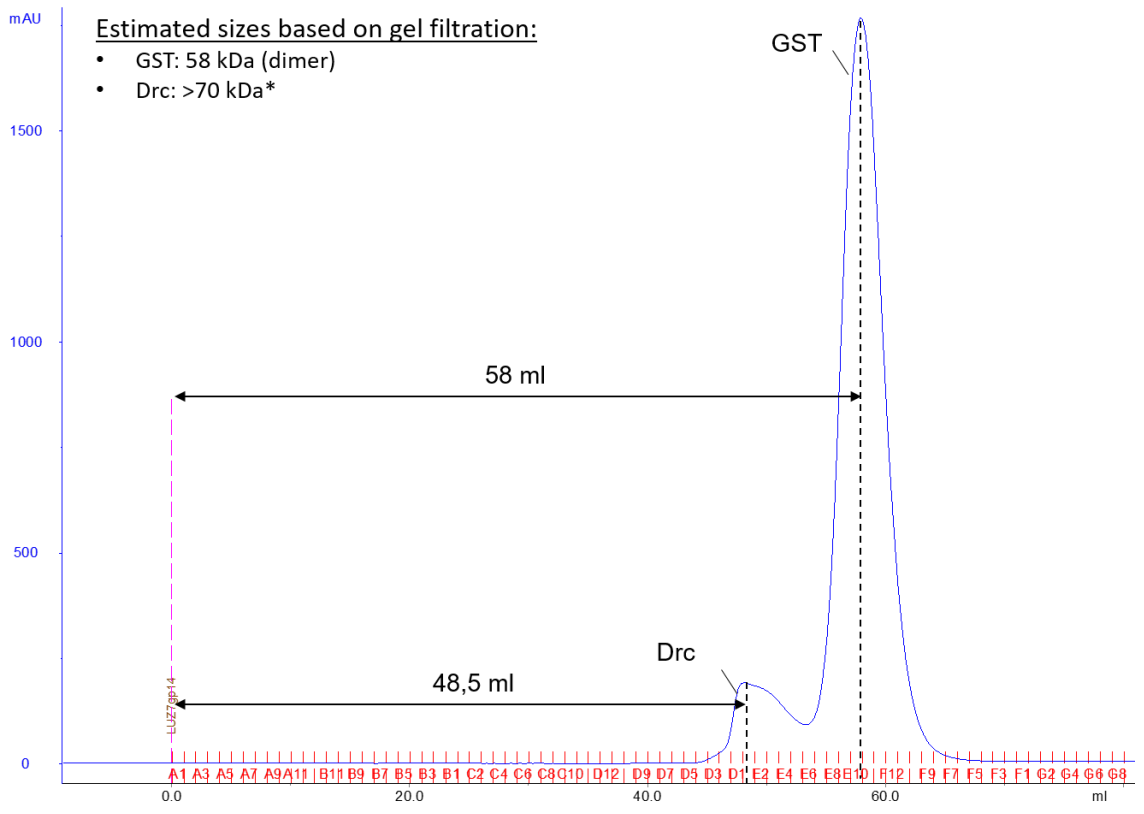**B**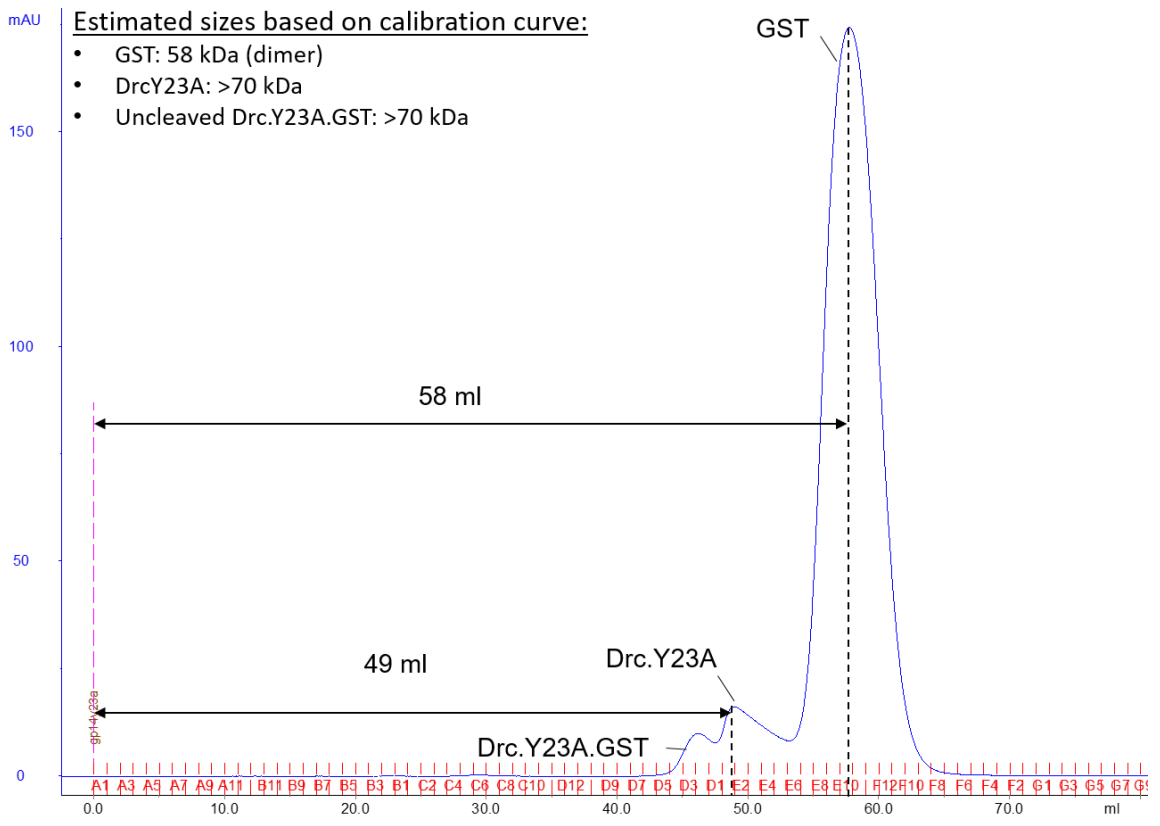

C

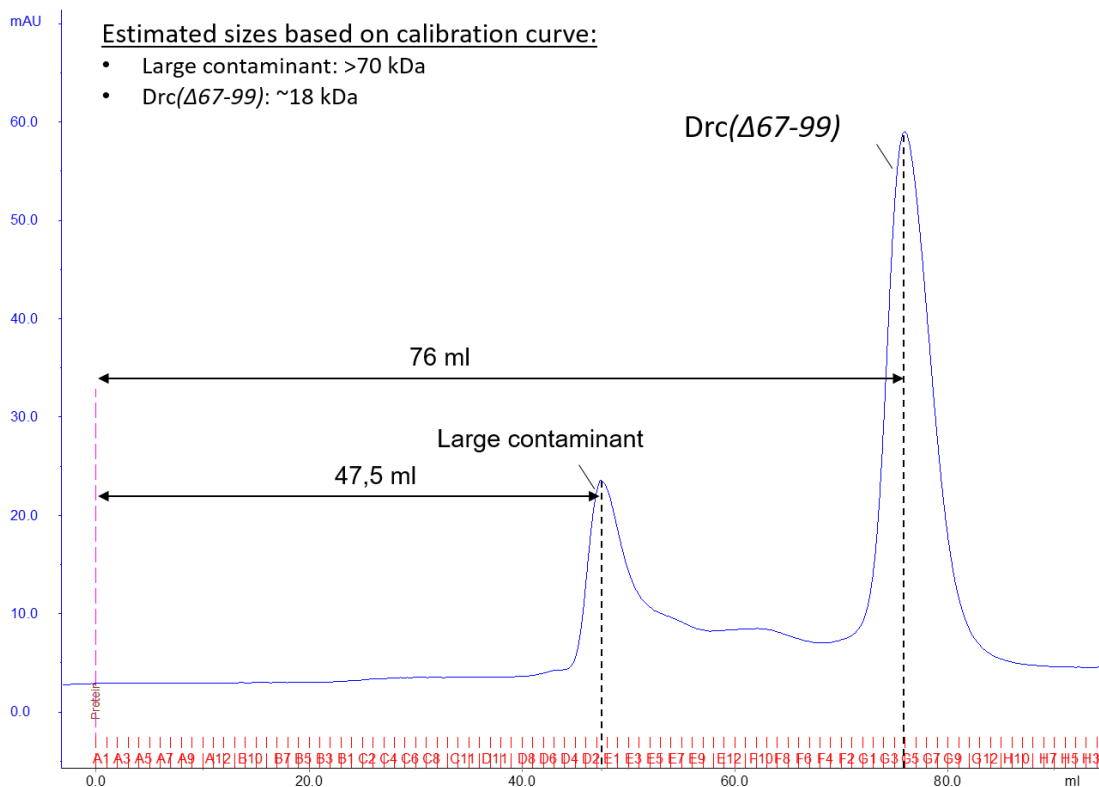

**Supplementary figure S7.** (A) Gel filtration chromatogram for Drc with cleaved GST tag (absorbance (mAU) in function of ml). Peaks were assigned to their protein based on SDS-PAGE analysis of the collected 1 ml fractions (red). Drc eluted at 48.5 ml, while GST eluted at 58 ml. Note that although this conforms with a >70 kDa protein (and thus higher than a Drc dimer), this size estimation is likely not correct due to the significant deviation from globularity by the terminal tails of Drc. (B) Gel filtration profile of Drc.Y23A, eluting at nearly identical volumes to wild type Drc. Some residual uncleaved protein was also observed (Drc.Y23A.GST). (C) Gel filtration chromatogram for Drc( $\Delta$ 67-99) after His-tag purification (mAU in function of ml). A first peak containing contaminating proteins eluted at 47.5 ml while Drc( $\Delta$ 67-99) eluted at 76 ml. This last one corresponds to a size of ~18 kDa, corresponding to a dimer. Note that with the removal of the tails in this protein, the protein now elutes at expected size.

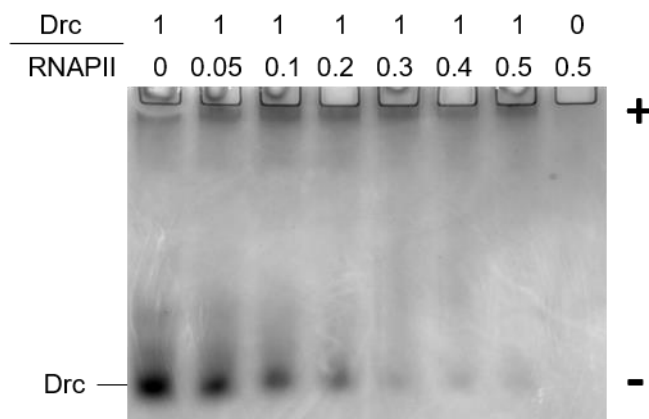

**Supplementary figure S8.** MSA with Drc and the RNAPII complex on a native 10% acrylamide gel with reversal of the polarity (charge of the poles indicated by + and - symbols). At the top of each lane the ratio of Drc:RNAPII in each condition is indicated (with 1 being 50  $\mu$ M and 0 being a buffer control). Drc was kept constant at 50  $\mu$ M, while the concentration of RNAPII was increased from left to right to the indicated ratio. The gel was run for 3 hours on ice at 150V.

**Supplementary table S3.** Homologs of N4 gp2 and LUZ7 gp14 (Drc). A psi-BLAST search was performed with the protein sequences of N4 gp2 (not the refseq sequence but the shorter sequence reported by Carter *et al.* (2003)) and Drc (YP\_003358296.1) against the non-redundant NCBI database. Up to three iterations were performed with each iteration including all significant hits. Each phage strain containing a homolog is given, together with the NCBI accession nr. of the protein homolog, its e-value and % of identity with the query.

| <b>Organisms with N4 gp2 homolog</b>     | <b>Accession nr.</b> | <b>E-value</b> | <b>Identity</b> |
|------------------------------------------|----------------------|----------------|-----------------|
| Escherichia phage OLB145                 | AYR04185.1           | 1,00E-90       | 100%            |
| Escherichia virus N4                     | YP_950480.1          | 3,00E-90       | 100%            |
| Escherichia phage PMBT57                 | AUV59078.1           | 5,00E-90       | 99%             |
| Klebsiella phage KP8                     | AVJ48917.1           | 5,00E-65       | 74%             |
| Escherichia phage Bp4                    | YP_009113236.1       | 2,00E-62       | 72%             |
| Escherichia phage PD38                   | AXY81283.1           | 2,00E-62       | 72%             |
| Escherichia phage ECBP1                  | YP_006908773.1       | 3,00E-62       | 72%             |
| Escherichia phage EC1-UPM                | AGC31513.1           | 4,00E-62       | 71%             |
| Escherichia phage IME11                  | YP_006990680.1       | 1,00E-61       | 73%             |
| Escherichia phage St11Ph5                | ATS92468.1           | 2,00E-61       | 70%             |
| Escherichia phage PGN829.1               | AXY82571.1           | 3,00E-61       | 71%             |
| Escherichia phage vB_EcoP_G7C            | YP_004782128.1       | 2,00E-60       | 71%             |
| Escherichia phage vB_EcoP_PhAPEC5        | YP_009055508.1       | 2,00E-58       | 70%             |
| Escherichia phage vB_EcoP_PhAPEC7        | YP_009056132.1       | 3,00E-58       | 70%             |
| Pseudomonas phage inbricus               | ATW58139.1           | 6,00E-41       | 58%             |
| Erwinia phage vB_EamP_Frozen             | YP_009286131.1       | 1,00E-30       | 45%             |
| Erwinia phage vB_EamP_Rexella            | ANJ65231.1           | 1,00E-30       | 45%             |
| Erwinia phage vB_EamP_Gutmeister         | ANJ65319.1           | 1,00E-30       | 45%             |
| Erwinia phage Ea9-2                      | YP_009007375.1       | 3,00E-30       | 45%             |
| Achromobacter phage phiAxp-3             | YP_009208654.1       | 8,00E-28       | 43%             |
| Xanthomonas phage RiverRider             | AVO23096.1           | 2,00E-26       | 41%             |
| Achromobacter phage JWAlpha              | YP_009004703.1       | 4,00E-25       | 40%             |
| Erwinia phage phiEaP-8                   | AWN06265.1           | 5,00E-25       | 40%             |
| Achromobacter phage JWDelta              | AHC56518.1           | 2,00E-24       | 41%             |
| Podoviridae sp.                          | AXH72057.1           | 4,00E-23       | 41%             |
| Shigella phage pSb-1                     | YP_009008442.1       | 9,00E-22       | 75%             |
| Mesorhizobium sp. M4B.F.Ca.ET.058.02.1.1 | WP_126055530.1       | 1,00E-19       | 39%             |
| Mesorhizobium sp. LSJC255A00             | WP_023705286.1       | 2,00E-16       | 40%             |
| Delftia phage RG-2014                    | YP_009148364.1       | 9,00E-16       | 33%             |
| Ochrobactrum anthropi                    | WP_125335540.1       | 7,00E-14       | 36%             |
| Pantoea eucrina                          | WP_084798739.1       | 4,00E-12       | 40%             |
| Escherichia phage Pollock                | YP_009152107.1       | 1,00E-11       | 36%             |
| Klebsiella phage Pylas                   | AYP69263.1           | 2,00E-10       | 34%             |
| Pseudomonas phage ZC03                   | AMD43426.1           | 7,00E-09       | 36%             |
| Pseudomonas phage ZC08                   | AMD43518.1           | 7,00E-09       | 36%             |
| Pantoea brenneri                         | WP_069729479.1       | 6,00E-08       | 39%             |
| Salmonella phage FSL SP-076              | YP_008240229.1       | 4,00E-07       | 31%             |
| Salmonella phage FSL SP-058              | YP_008239413.1       | 6,00E-07       | 33%             |

|                          |                |          |     |
|--------------------------|----------------|----------|-----|
| Lucilia cuprina          | KNC30488.1     | 3,00E-04 | 40% |
| Erwinia phage vB_EamP-S6 | YP_007005741.1 | 0.001    | 34% |
| Shigella phage pSb-1     | YP_009008441.1 | 0.003    | 50% |

**New hits in second iteration psi-BLAST\***

|                                    |                |          |     |
|------------------------------------|----------------|----------|-----|
| Ruegeria phage vB_RpoP-V12         | AWY08791.1     | 3,00E-14 | 25% |
| Ruegeria phage vB_RpoP-V21         | AWY08962.1     | 3,00E-14 | 25% |
| Ruegeria phage vB_RpoP-V17         | AWY09523.1     | 3,00E-14 | 25% |
| Ruegeria phage vB_RpoP-V14         | AXF42123.1     | 3,00E-14 | 25% |
| Dinoroseobacter phage DS-1410Ws-06 | ANJ20665.1     | 6,00E-14 | 24% |
| Roseobacter phage RD-1410Ws-07     | ANJ20816.1     | 6,00E-14 | 24% |
| Sulfitobacter phage phiCB2047-B    | YP_007675849.1 | 1,00E-13 | 24% |
| Silicibacter phage DSS3phi2        | YP_002899013.1 | 1,00E-13 | 26% |
| Sulfitobacter phage EE36phi1       | YP_002898935.1 | 4,00E-13 | 26% |
| Roseovarius sp. 217 phage 1        | CBW46996.1     | 5,00E-13 | 28% |
| Roseovarius Plymouth podovirus 1   | CBX87933.1     | 5,00E-13 | 28% |
| Ruegeria phage vB_RpoP-V13         | AWY09361.1     | 1,00E-11 | 26% |
| Dinoroseobacter phage DFL12phi1    | YP_009043758.1 | 1,00E-06 | 24% |
| Dinoroseobacter phage vBDshPR2C    | AID16822.1     | 1,00E-06 | 24% |

**New hits in third iteration psi-BLAST\***

|                                |            |       |     |
|--------------------------------|------------|-------|-----|
| Roseobacter phage RD-1410W1-01 | ANJ20746.1 | 1E-12 | 21% |
|--------------------------------|------------|-------|-----|

| <b>Organisms with Drc homolog</b>    | <b>Accession nr.</b> | <b>E-value</b> | <b>Identity</b> |
|--------------------------------------|----------------------|----------------|-----------------|
| Pseudomonas phage LUZ7               | YP_003358296.1       | 2,00E-66       | 100%            |
| Pseudomonas phage KPP21              | YP_009219005.1       | 2,00E-65       | 99%             |
| Pseudomonas phage Littlefix          | AUV61861.1           | 1,00E-07       | 36%             |
| Pseudomonas phage 98PfluR60PP        | AWH15510.1           | 7,00E-07       | 36%             |
| Pseudomonas phage PA26               | AFO70512.1           | 4,00E-06       | 39%             |
| Pseudomonas phage vB_PaeP_C2-10_Ab09 | YP_009031789.1       | 5,00E-06       | 39%             |
| Pseudomonas phage DL64               | YP_009206282.1       | 5,00E-06       | 39%             |
| Pseudomonas phage PEV2               | YP_009286234.1       | 5,00E-06       | 39%             |
| Pseudomonas phage vB_PaeP_MAG4       | YP_009290547.1       | 5,00E-06       | 39%             |
| Pseudomonas phage vB_PaeP_C2-10_Ab09 | CDN96825.1           | 5,00E-06       | 39%             |
| Pseudomonas phage RWG                | AIZ94763.1           | 5,00E-06       | 39%             |
| Pseudomonas phage vB_Pae575P-3       | ANT44290.1           | 5,00E-06       | 39%             |
| Pseudomonas phage vB_Pae1396P-5      | ANT44382.            | 5,00E-06       | 39%             |
| Pseudomonas phage vB_PaeP_PYO2       | ASZ72062.1           | 5,00E-06       | 39%             |
| Pseudomonas phage vB_PaeP_DEV        | ASZ72220.1           | 5,00E-06       | 39%             |
| Pseudomonas phage P3P1               | SBT96773.2           | 6,00E-06       | 38%             |
| Pseudomonas phage Pa2                | YP_009148193.1       | 8,00E-06       | 38%             |
| Pseudomonas phage phi176             | AIZ94946.1           | 8,00E-06       | 38%             |
| Pseudomonas phage YH6                | YP_009152515.1       | 8,00E-06       | 39%             |
| Pseudomonas phage YH30               | YP_009226100.1       | 8,00E-06       | 39%             |
| Pseudomonas phage LP14               | AWY02785.1           | 2,00E-05       | 38%             |
| Pseudomonas phage LIT1               | YP_003358410.1       | 3,00E-05       | 37%             |

**New hits in second iteration psi-BLAST\***



|                                                                                        |                |          |     |
|----------------------------------------------------------------------------------------|----------------|----------|-----|
| Pseudomonas phage phCDa                                                                | AXC36480.1     | 2,00E-05 | 25% |
| Marinobacterium litorale                                                               | WP_027854432.1 | 0.003    | 30% |
| <b>New hits found with Drc homolog query: YH6 (YP_009152515.1)**</b>                   |                |          |     |
| Pectobacterium phage vB_PatP_CB1                                                       | ARB11747.1     | 0.001    | 30% |
| Pectobacterium phage Nepra                                                             | AWD92598.1     | 0.001    | 30% |
| Pectobacterium phage vB_PatP_CB4                                                       | AQT27863.1     | 0.004    | 29% |
| Pectobacterium phage vB_PatP_CB3                                                       | ARB11845.1     | 0.004    | 29% |
| <b>Phage hit below threshold in second iteration psi-BLAST with YH6 Drc homolog***</b> |                |          |     |
| Acinetobacter phage Presley                                                            | YP_009007581.1 | 1.4      | 26% |

\* E-values obtained from consecutive psi-BLAST searches are the values for that specific iteration and are not comparable to values from other iterations.

\*\* For Drc homologs, no new hits were observed in the third iteration. Instead a new search with a more distant Drc homolog did retrieve new hits within the evolutionary more distant CB1-like phages.

\*\*\* Although not within the threshold of significance, the hit is given for completeness as phage Presley is expected to have a Drc homolog based on its phylogenetics. Given the large evolutionary distance, it might be a Drc homolog which is too diverged to reach significance.
